# Supplementary material
Source: publisher figshare collection journal article supplement (https://acs.figshare.com/ndownloader/files/4211029)
Supplement: Supplementary file 1 [file 4211029]

## SUPPORTING INFORMATION

### Structural and Kinetic Analysis of the Unnatural Fusion Protein 4-Coumaroyl-CoA Ligase::Stilbene Synthase

Yechun Wang, Hankuil Yi, Melissa Wang, Oliver Yu,\* and Joseph M. Jez

#### 1. EXPERIMENTAL PROCEDURES

**Chemicals.** Standard chemicals, including 4-coumaric acid, malonyl-CoA, CoA, and resveratrol were purchased from Sigma-Aldrich. Acetonitrile was from MP Biomedicals and all other solvents for HPLC and Orbitrap ESI-MS/MS were from Fisher Scientific. All enzymes were from New England Biolabs, unless specified otherwise.

**Gene isolation and expression vector construction.** Oligonucleotides were designed for PCR amplification of At4CL1<sup>1</sup>, as follows: 4CL1F, 5'-dGCTCTAGAATGGCGCCACAAGAACAAGCAGTTTCTCAG-3' (XbaI site underlined) and 4CL1R: 5'-dCCCTCGAGTCACAATCCATTTGCTAGTTTTGCCCTCAGA-3' (XhoI site underlined). For amplification of VvSTS<sup>2</sup>, oligonucleotide primers were designed as follows: STSF: 5'-dTAAAGGATCCATGGCTTCAGTCGAGGAATTTAGAAACGCTC-3' (XbaI site underlined) and STSR: 5'-dCCCTCGAGTTAATTTGTAACCATAGGAATGCTATGTAGC-3' (XhoI site underlined). To generate bacterial expression constructs, the vector pESC-TRP-4CL::STS<sup>3</sup> was used as a template to PCR amplify At4CL1, VvSTS, and 4CL::STS for sub-cloning into pET-28a(+).

**Expression and purification of At4CL1, VvSTS and 4CL::STS.** Each expression construct was transformed into *Escherichia coli* Rosetta(DE3) grown in LB media containing 50 µg mL<sup>-1</sup> kanamycin and 35 µg mL<sup>-1</sup> chloramphenicol at 37 °C until A<sub>600nm</sub> ~0.8-1.0. Protein expression was induced by addition of 1 mM isopropyl-β-D-thiogalactopyranoside and the culture grown at 16 °C for 20 hr. Cells were harvested by centrifugation (3,000 x g; 10 min; 4 °C) with the cell pellets either used immediately or stored at -80 °C. Pellets were re-suspended in lysis buffer (50 mM Tris, pH 8.0, 20 mM imidazole, 500 mM NaCl, 10% glycerol, and 1% Tween-20). Cells were disrupted by sonication (10 x 30 s; 4 °C). Cell debris was clarified by centrifugation (40,000 x g; 30 min). Supernatant was added to a pre-equilibrated (lysis buffer) Ni<sup>2+</sup>-nitrilotriacetic acid (Qiagen) affinity column. After loading of protein sample, the column was washed (50 mM Tris, pH 8.0, 20 mM imidazole, 500 mM NaCl, and 10% glycerol) to remove unbound contaminant proteins. His-tagged proteins were eluted (50 mM Tris, pH 8.0, 250 mM imidazole, 500 mM NaCl, and 10% glycerol). The eluted 4CL and 4CL::STS were then dialyzed in 20 mM Tris, pH 8.0, 100 mM NaCl buffer; eluted STS was dialyzed in 20 mM HEPES, pH 8.0, 5 mM EDTA and 100 mM NaCl buffer. All proteins were purified by size-exclusion chromatography on a HiLoad 16/60 Superdex-200 FPLC column in their corresponding buffers. For crystallization, 4CL::STS was further purified using a second round of size-exclusion chromatography (20 mM Tris, pH8, 50 mM NaCl). Protein concentrations were determined using the BioRad protein assay with BSA as a standard.

**Enzymatic synthesis of *p*-coumaroyl-CoA by At4CL1.** At4CL1 was used to enzymatically prepare *p*-coumaroyl-CoA<sup>4</sup>. Reactions (10 mL; 25 °C) were performed in 100 mM Tris, pH 8, 2 mM dithiothreitol (DTT), 10 mM MgCl<sub>2</sub>, 5 mM ATP, 200 µM *p*-coumaric acid, and 1 mM CoA with 0.5 mg At4CL1. After 30 min, the reaction was terminated by addition of acetic acid, mixed, and centrifuged (20,000 x g; 30 min). Purification of *p*-coumaroyl-CoA was performed using an Agilent 1100 HPLC (Agilent) with a Gemini-NX C18 column (Phenomenex, 5 µm, 150 mm x3 mm). The mobile phase flow was set to 0.6 mL min<sup>-1</sup> with a

binary gradient elution using solvent A (100% acetonitrile) and solvent B (0.5% TFA in water). The gradient was as follows: 0-5 min, 10% A; 5-25 min, 10-30% A; 25-40 min, 30% A; 40-40.1 min, 30-100% A; 40.1-43 min, 100% A; 43-43.1 min, 100-10% A; 43.1-46 min, 10% A. A diode array detector was used to record  $A_{333nm}$  and the *p*-coumaroyl-CoA peak collected in 2 mL fractions, which were then pooled and lyophilized. To confirm the product, a sample was dissolved in 1% formic acid in methanol to 1 mM and analyzed on an LTQ-Orbitrap Velos mass spectrometer (Thermo Fisher Scientific) by direct infusion. The LTQ-Orbitrap Velos was operated in positive ion mode. The scan mode is FTMS + pNSI full ms from 500 to 1200. The resolution was 30k and the ion injection times were set to 9.094 ms. The theoretical  $[M-H]^+$  of *p*-coumaroyl-CoA is 914.15 with single charge ( $H^+$ ) and the  $m/z$  of the main peak on the spectrum resulting from enzymatic synthesis is 914.16 (Figure S4). The extinction coefficient used for *p*-coumaroyl-CoA quantification was  $\epsilon_{333}=21 \text{ mM cm}^{-1}$ .

**Enzyme assays and steady-state kinetic analysis.** Assays for 4CL and STS activity of At4CL1, VvSTS, and the 4CL::STS fusion protein were performed using a standard buffer condition: 100 mM Tris, pH 8, 2 mM DTT, and 10 mM  $MgCl_2$ . For 4CL activity, 5 mM ATP, 200  $\mu M$  *p*-coumaric acid, and 2 mM CoA were used in the assay described by Knobloch & Hahlbrock<sup>5</sup>. For STS activity, 400  $\mu M$  *p*-coumaroyl-CoA and 500  $\mu M$  *p*-malonyl-CoA were used as previously described<sup>6</sup>. The reaction product was analyzed using a 4000 QTRAP LC-MS/MS system (Applied Biosystems) with multiple reaction monitoring (MRM) to obtain specific MS/MS ions of resveratrol<sup>7</sup>. The electrospray ion source of the mass spectrometer was operated at 550°C in negative ion mode. MRM-selected ions for resveratrol was 227/143<sup>8</sup>. The quantification was performed based on standard curves constructed using pure resveratrol. Kinetic parameters were determined for At4CL1, VvSTS, and 4CL::STS using the above assays with varied substrate concentrations and the resulting data fit to  $v = (k_{cat}[S])/(K_m + [S])$  in GraphPad Prism.

**Crystallization and structure determination of the 4CL::STS fusion protein.** Crystals of 4CL::STS were produced by the vapor diffusion method at 4 °C. Protein (10 mg mL<sup>-1</sup>) was mixed with crystallization buffer (18.5% PEG-3350, 0.24 M potassium citrate, and 10 mM sarcosine) in a 1:1 ratio of a 4  $\mu L$  drop over 0.7 mL of crystallization buffer. Before data collection at 100 K, crystals were soaked in mother liquor containing 30% glycerol. Collection, integration, and reduction of diffraction data were performed at beamline 19-ID of the Advanced Photon Source Argonne National Laboratory using SBC COLLECT and HKL3000<sup>9</sup>. The structure of 4CL::STS was solved by molecular replacement performed with PHASER<sup>10</sup>. For molecular replacement, two independent search ensembles were used, as follows: poplar 4CL (PDB: 3A9U)<sup>11</sup> and peanut STS (PDB: 1Z1E)<sup>12</sup>. Each ensemble was searched for in sequence, which lead to placement of each molecule with a rotation Z-score of 26.4 and a translation Z-score of 68.5 with an initial FOM = 0.70. Model building was performed in COOT<sup>13</sup> and all refinements (resolution range: 49.21 - 3.1 Å with a 5% of reflections used for  $R_{free}$ ) were performed with PHENIX<sup>14</sup>. For refinement, each domain (i.e., At4CL1 and VvSTS) of the fusion protein was used as a TLS group. Data collection and refinement statistics are reported in Table S1. The atomic coordinates and structure factors for the 4CL::STS fusion protein have been deposited in the Protein Data Bank (PDB: 3TSY).

## 2. EXPERIMENTAL RESULTS

**Table S1:** Data Collection and Refinement Statistics

|                                                        |                                                    |
|--------------------------------------------------------|----------------------------------------------------|
| Crystal                                                |                                                    |
| Space group                                            | P 4 <sub>1</sub> 22                                |
| Cell dimensions                                        | $a = b = 117.7 \text{ \AA}, c = 244.0 \text{ \AA}$ |
| Data Collection                                        |                                                    |
| Wavelength                                             | 0.979 \AA                                          |
| Resolution (highest shell)                             | 49.21 - 3.1 \AA (3.15-3.10 \AA)                    |
| Reflections (total/unique)                             | 200,672 /                                          |
| Completeness (highest shell)                           | 100% (100%)                                        |
| $\langle I/\sigma \rangle$ (highest shell)             | 17.7 (1.9)                                         |
| R <sub>sym</sub> (highest shell)                       | 8.2% (87.6%)                                       |
| Refinement                                             |                                                    |
| R <sub>cryst</sub> / R <sub>free</sub>                 | 17.7% / 20.8%                                      |
| No. of protein atoms                                   | 6,323                                              |
| R.m.s. deviation, bond lengths                         | 0.016 \AA                                          |
| R.m.s. deviation, bond angles                          | 1.33°                                              |
| Avg. B-factor - protein                                | 87.0 \AA <sup>2</sup>                              |
| Stereochemistry: favored, allowed, generously allowed. | 96.7, 3.2, 0.1%                                    |

**Figure S1.** Purification of At4CL1, VvSTS and 4CL::STS. (i) SDS-PAGE gel of purified proteins. Lane 1: molecular weight standard, Lane 2: At4CL1 (61 kDa), Lane 3: VvSTS (47 kDa), Lane 4: 4CL::STS (114 kDa). (ii) Elution profiles of At4CL1 (A), VvSTS (B), and 4CL::STS (C), from a HiLoad 16/60 Superdex-200 FPLC column are shown. At4CL1, VvSTS, and 4CL::STS elute from the column as 70 kDa, 70 kDa, and 200 kDa species corresponding to monomeric, dimeric, and dimeric forms, respectively.

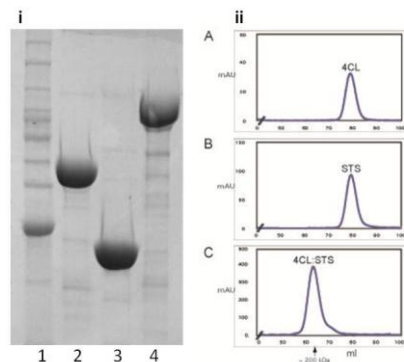

**Figure S2.** Representative electron density in the 4CL::STS fusion protein. (A) The  $2F_o - F_c$  omit map ( $1.5 \sigma$ ) for the STS active site showing the catalytic residues. (B) The  $2F_o - F_c$  omit map ( $1.5 \sigma$ ) for the 4CL active site showing ATP binding residues.

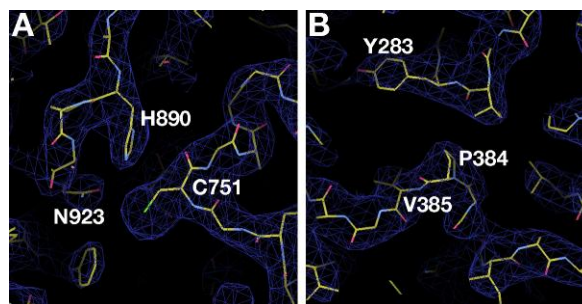

**Figure S3.** Comparison of plant 4CL structures highlighting movement of the C-terminal domain. (A) Structure of At4CL1 in the 4CL::STS fusion protein. The disordered C-terminal domain is shown in gold based on the poplar 4CL apoenzyme structure. (B) Structure of poplar 4CL with AMP bound in the active site (PDB: 3A9V). (C) Structure of the poplar 4CL apoenzyme (PDB: 3A9U). Note the rotational movement of the C-terminal domain, corresponding to the region colored gold in (A), when compared to that in (C).

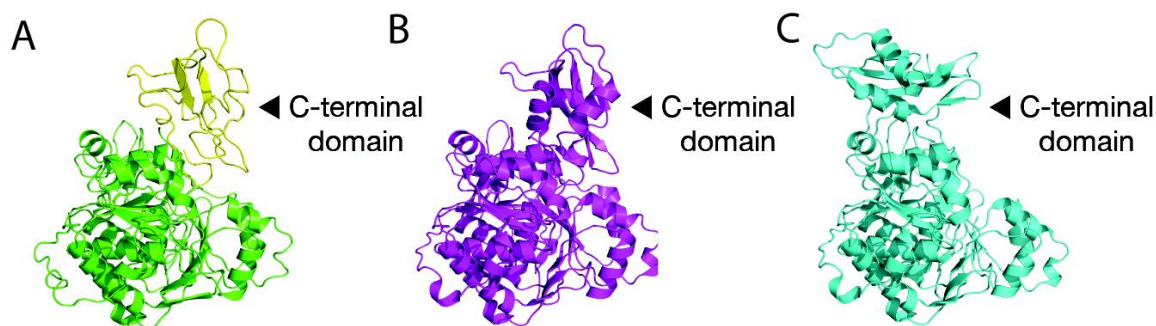

**Figure S4.** Identification of *p*-coumaroyl-CoA. The putative *p*-coumaroyl-CoA peak was confirmed by mass spectrometry using an LTQ Orbitrap Velos instrument. The theoretical  $[M-H]^+$  is 914.15 with single charge ( $H^+$ ) and the  $m/z$  of the main peak on the spectrum is 914.16.

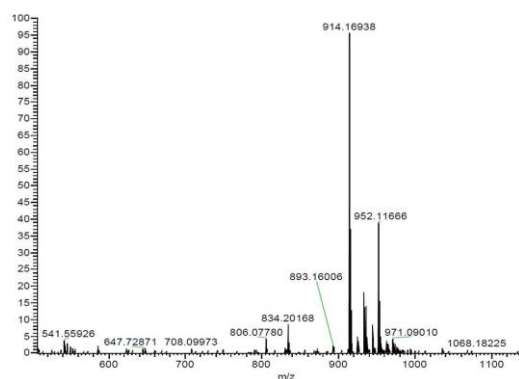

### 3. REFERENCES FOR SUPPORTING INFORMATION

- (1) Lee, D.; Ellard, M.; Wanner, L.A.; Davis, K.R.; Douglas, C.J. *Plant Mol. Biol.* **1995**, *28*, 871-884.
- (2) Sparvoli, F.; Martin, C.; Scienza, A.; Gavazzi, G.; Tonelli, C. *Plant Mol. Biol.* **1994**, *24*, 743-755.
- (3) Zhang, Y.; Li, S.Z.; Pan, X.; Cahoon, R.E.; Jaworski, J.G.; Wang, X.; Jez, J.M.; Chen, F.; Yu, O. *J. Am. Chem. Soc.* **2006**, *128*, 13030-13031.
- (4) Obel, N.; Scheller, H.V. *Anal. Biochem.* **2000**, *286*, 38-44.
- (5) Lim, C.G.; Fowler, Z.L.; Hueller, T.; Scaffer, S.; Koffas, M.A. *Appl. Environ. Microbiol.* **2011**, *77*, 3451-3460.
- (6) Knobloch, K.H.; Hahlbrock, K. *Arch. Biochem. Biophys.* **1977**, *184*, 237-248.
- (7) Wang, Y.; Halls, C.; Zhang, J.; Matsuno, M.; Zhang, Y.; Yu, O. *Metab. Eng.* **2011**, *13*, 455-463.
- (8) Careri, M.; Corradini, C.; Elviri, L.; Nicoletti, I.; Zagnoni, I. *J Agric Food Chem* **2004**, *52*, 6868-74.
- (9) Otwinowski, Z.; Minor, W. *Methods Enzymol.* **1997**, *276*, 307-326.
- (10) McCoy, A.J.; Grosse-Kunstleve, R.W.; Adams, P.D.; Winn, M.D.; Storoni, L.C.; Read, R.J. *J. Appl. Cryst.* **2007**, *40*, 658-674.
- (11) Hu, Y.; Gai, Y.; Yin, L.; Wang, X.; Feng, C.; Feng, L.; Li, D.; Jiang, X.N.; Wang, D.C. *Plant Cell* **2010**, *22*, 3093-3104.
- (12) Austin, M.B.; Bowman, M.E.; Ferrer, J.L.; Schröder, J.; Noel, J.P. *Chem. Biol.* **2004**, *11*, 1179-1194.
- (13) Emsley, P.; Lohkamp, B.; Scott, W.G.; Cowtan, K. *Acta Crystallogr. D* **2010**, *66*, 486-501.
- (14) Adams, P.D. et al. *Acta Crystallogr. D* **2010**, *66*, 213-221.
